# Supplementary material for: Olfactory dysfunction as a common biomarker for neurodegenerative and neuropsychiatric disorders
Source: PubMed Central journal article supplement — Neural Regen Res. 2022 Oct 10;18(5):1029–30. doi: 10.4103/1673-5374.355756 (PMC9827770; doi:10.4103/1673-5374.355756), 2022-10-10
Supplement: NRR-18-1029_Suppl1.pdf [file NRR-18-1029_Suppl1.pdf]

## OPEN PEER REVIEW REPORT 1

**Name of journal:** Neural Regeneration Research

**Manuscript NO:** NRR-D-22-00483

**Title:** Olfactory dysfunction as a common biomarker for neurodegenerative and neuropsychiatric disorders

**Reviewer's Name:** Concepció Marin

**Reviewer's country:** Spain

### COMMENTS TO AUTHORS

This manuscript is a review of several previous reviews on olfactory dysfunction in neurodegenerative and neuropsychiatric disorders, without any new data regarding clinical or underlying pathophysiological mechanisms involved in loss of smell in these disorders.

The data presented in this manuscript is based on reviews, in addition, some of the reviews are 10 years old, thus, no new recent data is incorporated.

In addition, the neurological and psychiatric disorders are not well described and are all mixed based in the different components of olfaction, inducing a difficult to follow the reading and to identify the relevant (although old) points.

The authors should consider new references but control the presence of references along the journal (<13).
